# Supplementary material for: Identifying novel strategies for treating human hair loss disorders: Cyclosporine A suppresses the Wnt inhibitor, SFRP1, in the dermal papilla of human scalp hair follicles
Source: PLOS journal article supplement (doi:10.1371/journal.pbio.2003705), 2018-05-08
Supplement: S14 (10.1371/journal.pbio.2003705.s014) [file journal.pbio.2003705.s014]

**S2 Table.** Review of anagen prolongation by CsA treatment

| Model                                                     | CsA administration | Species                                                    | Notes                                                                                                                                                                                                                             | Reference |
|-----------------------------------------------------------|--------------------|------------------------------------------------------------|-----------------------------------------------------------------------------------------------------------------------------------------------------------------------------------------------------------------------------------|-----------|
| <i>Ex vivo</i> (isolated HF <sub>s</sub> )                | Culture medium     | Human                                                      | CsA at 10 <sup>-7</sup> M concentration gave a 42% greater mean hair shaft elongation after 15 days of treatment. 43% of CsA treated HF <sub>s</sub> were still growing at day 15 compared to the 2% of control HF <sub>s</sub> . | 1         |
| <i>Ex vivo</i> (isolated HF <sub>s</sub> )                | Culture medium     | Human                                                      | CsA treated HF <sub>s</sub> inhibited catagen morphology after 6 days of treatment (10 <sup>-7</sup> M concentration).                                                                                                            | 2         |
| <i>In vivo</i> (xenotransplant)                           | Topical            | Human HF <sub>s</sub> grafted onto nude mice               | CsA treatment prolongs anagen.                                                                                                                                                                                                    | 3         |
| <i>In vitro</i> (isolated hair follicle epithelial cells) | Culture medium     | Male nude mice of Balb/c origin and<br>Female C57BL/6 mice | Dose dependent reduction of early and late apoptosis.                                                                                                                                                                             | 4         |
| <i>In vivo</i>                                            | Intraperitoneal    | C57BL/6 mice                                               | 85% of control mice entered telogen via catagen on day 19 whereas only 6% of CsA treated mice entered telogen.                                                                                                                    | 5         |
| <i>In vivo</i>                                            | Topical            | 6-9 week old female C57BL/6 mice                           | CsA inhibited DEX induced catagen. The activity of CsA was concentration dependent.                                                                                                                                               | 6         |
| <i>In vivo</i>                                            | Intraperitoneal    | 6-8 week old female C57BL/6 mice                           | CsA inhibited DEX induced catagen.                                                                                                                                                                                                | 7         |
| <i>In vivo</i> -<br>(chemotherapy induced alopecia)       | Intraperitoneal    | 6-8 week old female C57BL/6 mice                           | CsA retard cyclophosphamide-induced alopecia.                                                                                                                                                                                     | 8         |
| <i>Ex vivo</i> (vibrissae HF <sub>s</sub> )               | Culture medium     | Male and Female C57BL/6 mice                               | CsA prevents catagen morphology.<br><br>63% of control HF <sub>s</sub> ejected the hair shaft on day 10 while CsA treatment only had 23%. CsA                                                                                     | 9         |

|                |                 |                           |                                                                                                                                      |    |
|----------------|-----------------|---------------------------|--------------------------------------------------------------------------------------------------------------------------------------|----|
|                |                 |                           | treated HFs had significantly higher Ki-67+ cells compared to control. There were more TUNEL+ cells in control than CsA treated HFs. |    |
| <i>In vivo</i> | Oral            | Nude mice                 | CsA inhibited catagen in a dose dependent manner. CsA altered cytokine and apoptotic protein expression.                             | 10 |
| <i>In vivo</i> | Intraperitoneal | 28 day old Male nude mice | CsA enhanced proliferation and inhibited terminal differentiation.                                                                   | 11 |

1. Taylor M, Ashcroft ATT, Messenger AG. Cyclosporin A prolongs human hair growth in vitro. *J Invest Dermatol.* 1993;100(3):237-239.
2. Hawkshaw NJ, Haslam IS, Ansell DM, Shamalak A, Paus R. Re-evaluating Cyclosporine A as a hair growth-promoting agent in human scalp hair follicles. *J Invest Dermatol.* 2015;135(8):2129-2132.
3. Gilhar A, Pillar T, Etzioni A. The effect of topical cyclosporin on the immediate shedding of human scalp hair grafted onto nude mice. *Br J Dermatol.* 1988;119(6):767-770.
4. Gafter-Gvili A, Sredni B, Gal R, Gafter U, Kalechman Y. Cyclosporin A-induced hair growth in mice is associated with inhibition of calcineurin-dependent activation of NFAT in follicular keratinocytes. *Am J Physiol Cell Physiol.* 2003;284(6):C1593-603.
5. Paus R, Henz B, Maurer M. Hair growth control by immunosuppression. *Arch Dermatol Res.* 1996;288(7):408-410.
6. Maurer M, Handjiski B, Paus R. Hair growth modulation by topical immunophilin ligands: induction of anagen, inhibition of massive catagen development, and relative protection from chemotherapy-induced alopecia. *Am J Pathol.* 1997;150(4):1433-1441.
7. Paus R, Handjiski B, Czarnetzki BM, Eichmüller S. A murine model for inducing and manipulating hair follicle regression (catagen): effects of dexamethasone and cyclosporin A. *J Invest Dermatol.* 1994;103(2):143-147.
8. Paus R, Handjiski B, Eichmüller S, Czarnetzki BM. Chemotherapy-induced alopecia in mice. Induction by cyclophosphamide, inhibition by cyclosporine A, and modulation by dexamethasone. *Am J Pathol.* 1994;144(4):719-734.
9. Xu W, Fan W, Yao K. Cyclosporine A stimulated hair growth from mouse vibrissae follicles in an organ culture model. *J Biomed Res.* 2012;26(5):372-380.
10. Gafter-Gvili A, Kalechman Y, Sredni B, Gal R, Gafter U. Cyclosporin A-induced hair growth in mice is associated with inhibition of hair follicle regression. *Arch Dermatol Res.* 2004;296(6):265-269.
11. Fujimura A, Michiue H, Nishiki T, et al. Expression of a constitutively active calcineurin encoded by an intron-retaining mRNA in follicular keratinocytes. *PLoS One.* 2011;6(3):e17685.
